# Supplementary material for: Comparing Light and Dark Chamber Measurements of CH4 Fluxes in Drained and Rewetted Raised Bogs of Ireland
Source: Research Square preprint supplement (doi:10.21203/rs.3.rs-6810432/v1), 2025-06-12
Supplement: Supplementary file 1 [file cb4c7a855891ca3a9c1f106d.docx]

**Title**Comparing Light and Dark Chamber Measurements of CH4 Fluxes in Drained and Rewetted Raised Bogs of Ireland.

**Journal name**Wetlands Ecology and Management

**Author information and affiliations**
School of Architecture, Building and Environment, Technological University Dublin, Bolton Street,
Dublin 1, Ireland
Stephen Barry

Bord na Mona, Leabeg, Boora Ave, Co. Offaly, Ireland
Kenneth Crawford, Clare O’Doherty, G Heagney, Harry Kelly, Mark McCorry, Hannah Mealy, Brian Mollahan

Department of Biological Sciences & Bernal Institute, Faculty of Science and Engineering,
University of Limerick, Limerick, Ireland
Mike Clancy, Amey S. Tilak and Kenneth A. Byrne

School of Natural Sciences, Botany Discipline, Trinity College, Dublin, Ireland
Matthew Saunders

**Corresponding author:** Stephen Barry [barry.stephen@tudublin.ie](mailto:barry.stephen@tudublin.ie)

**Supplementary material 1**


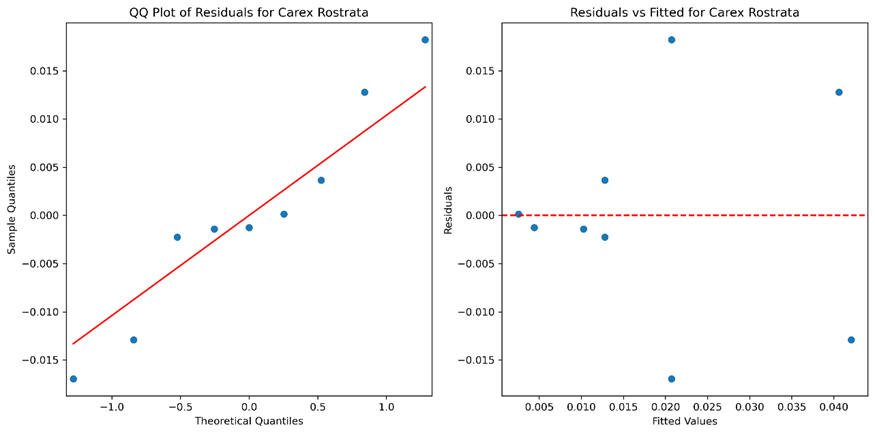


**Figure S1**. QQ plots and residuals vs line for *Carex rostrata*


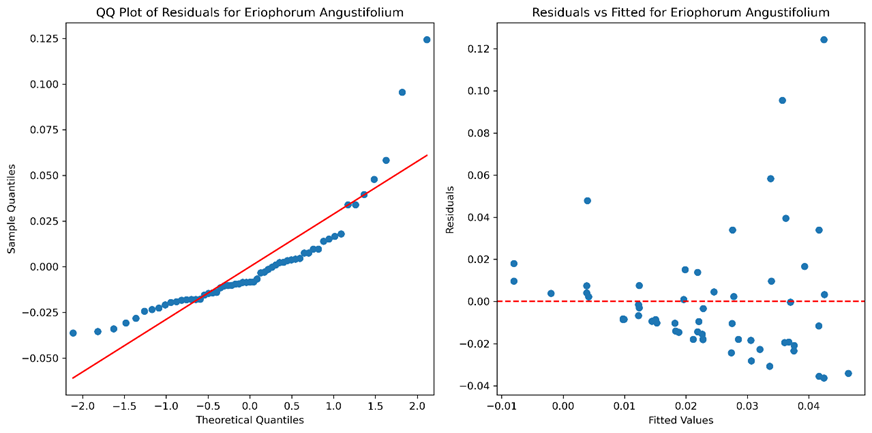


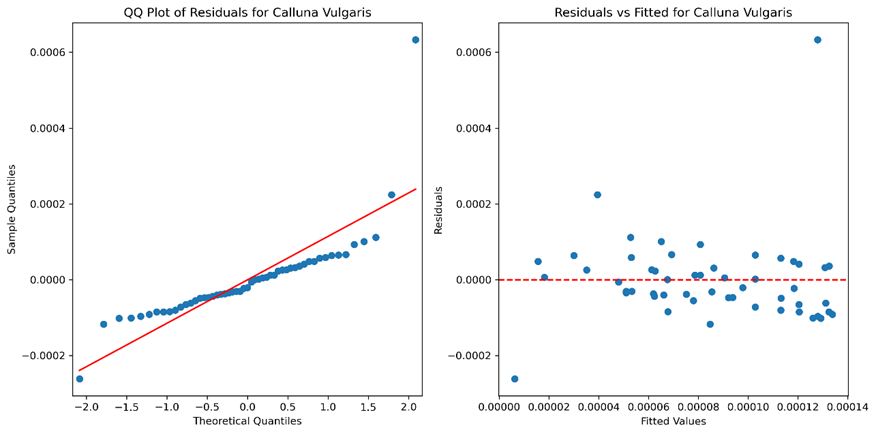


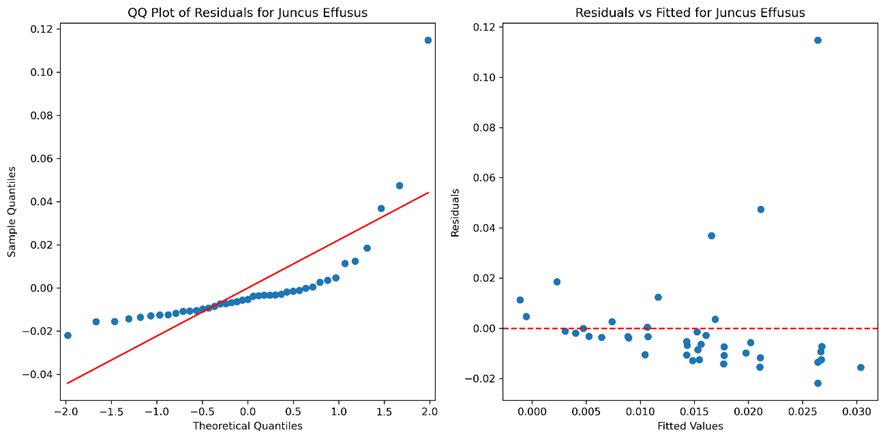


**Figure S2**. QQ plots and residuals vs line for *Juncus effusus*


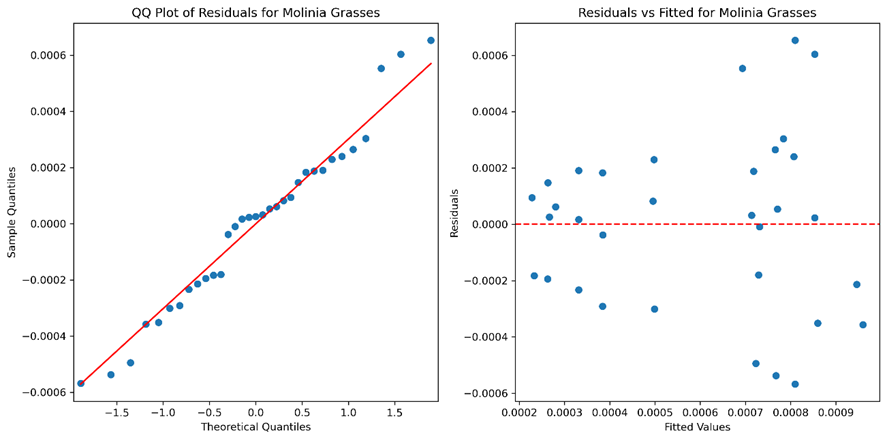


**Figure S3**. QQ plots and residuals vs line for *Molonia* *caerulea*


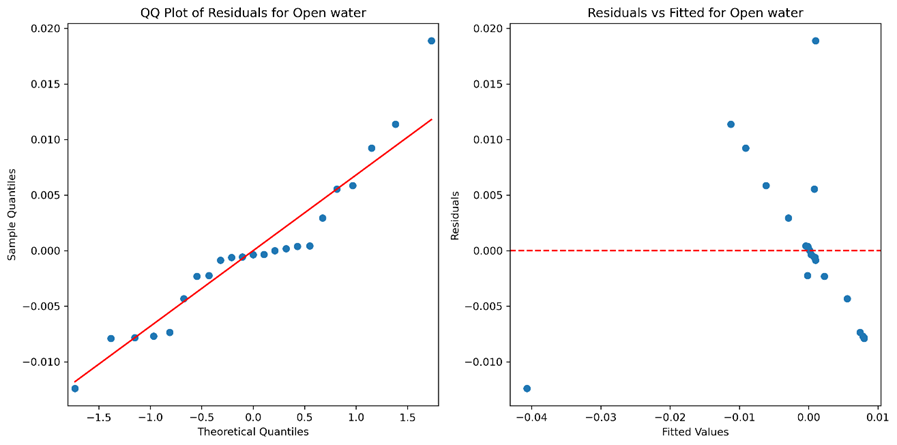


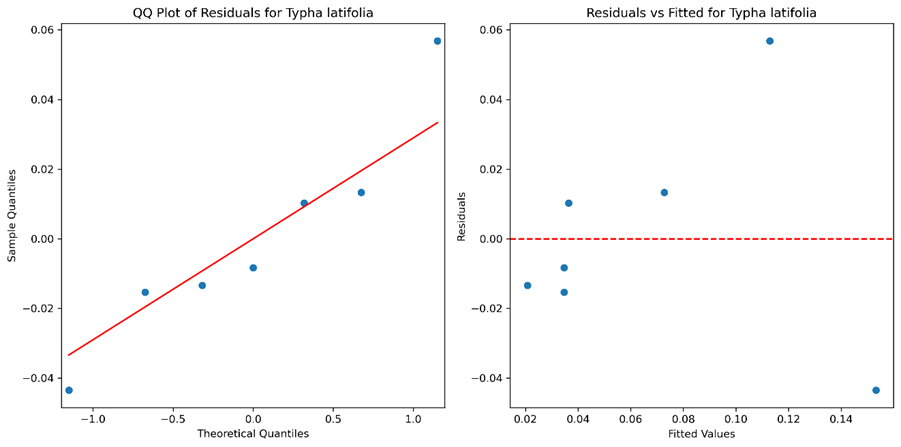
**Figure S4**. QQ plots and residuals vs line for Open water


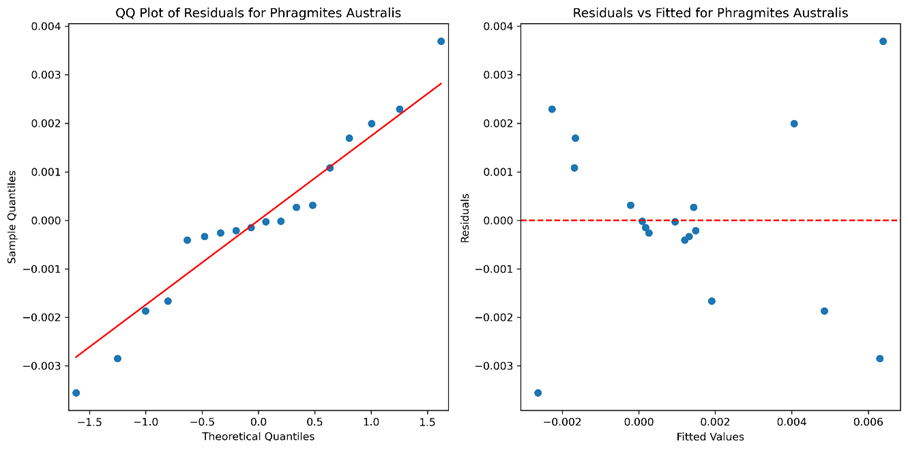
**Figure S5**. QQ plots and residuals vs line for *Typha latifolia*

**Figure S6**. QQ plots and residuals vs line for *Phragmites australis*


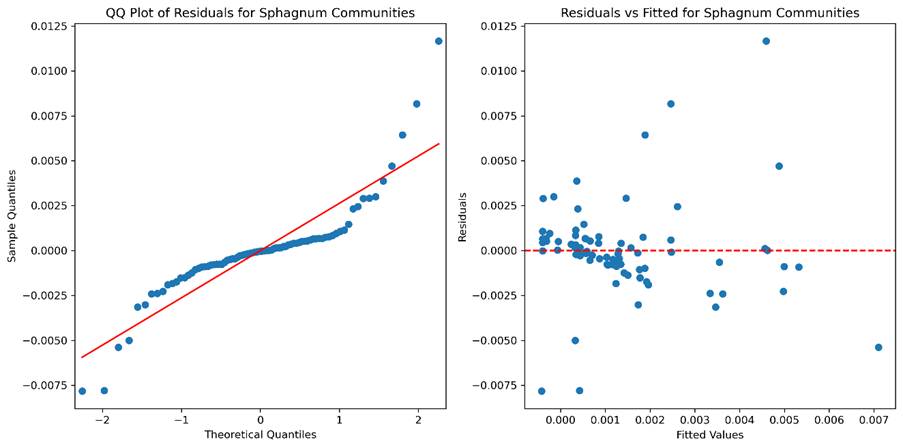


**
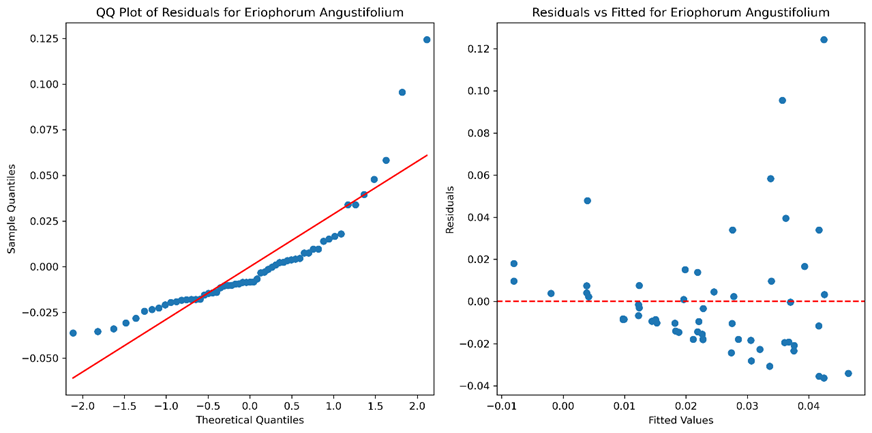
Figure S7**. QQ plots and residuals vs line for *Sphagnum* communities

**Figure S8**. QQ plots and residuals vs line for *Eriophorum angustifolium*


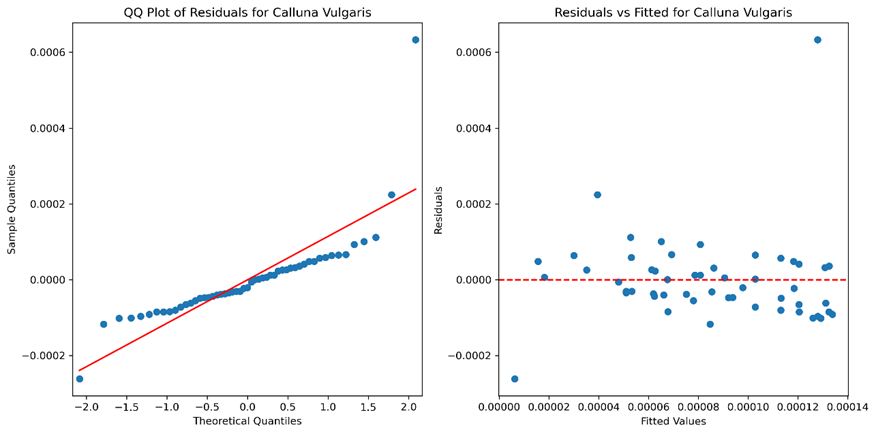


**Figure S9**. QQ plots and residuals vs line for *Calluna vulgaris*

**
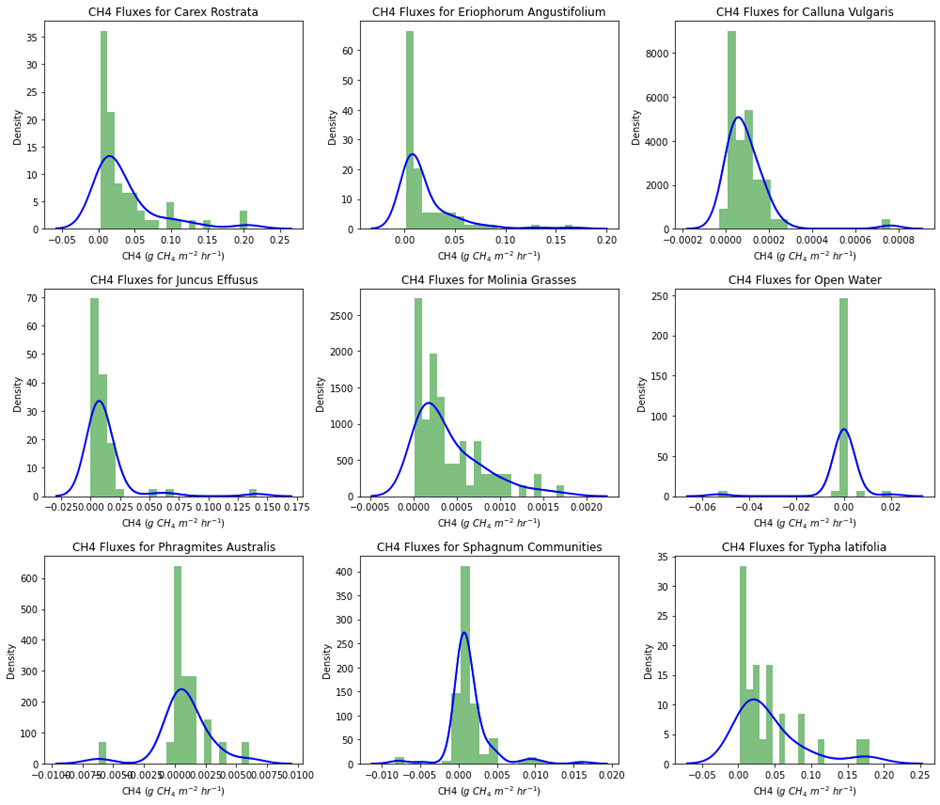
**

**Figure S10**. Histograms and Kernel Density Estimation (KDE) plots for *Carex rostrata*, *Eriophorum* *angustifolium*, *Calluna vulgaris*, *Juncus effusus*, *Molonia caerulea*, Open water, *Phragmites australis*, *Sphagnum* communities and *Typha latifolia*

**
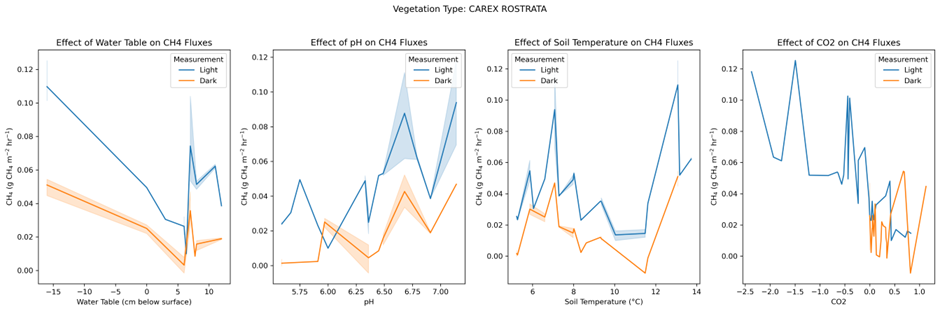
**

**
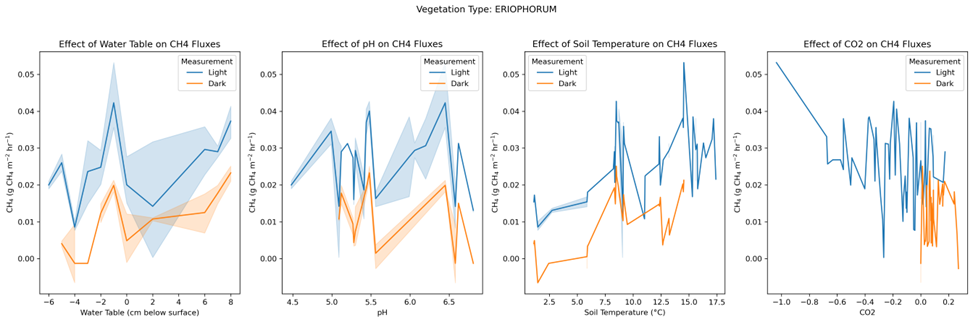
**
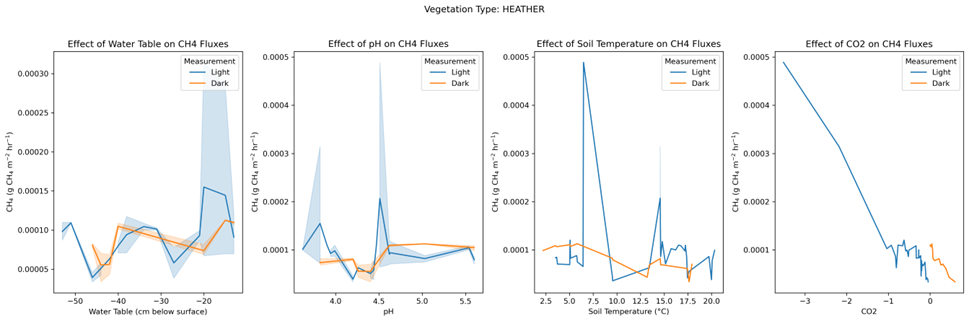


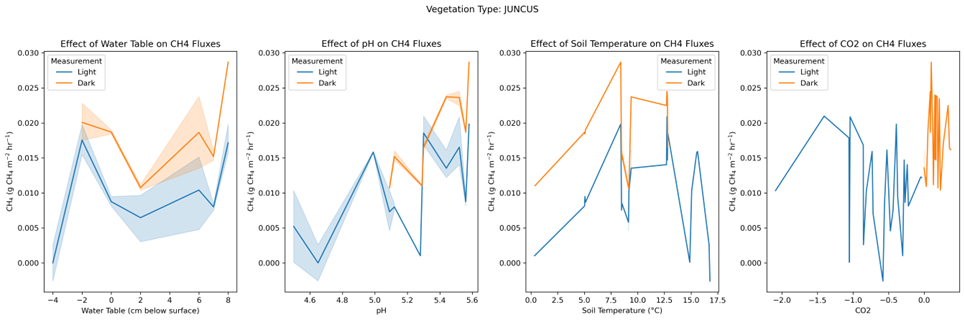


**Figure S11**. Comparing light and dark CH4 fluxes for *Carex rostrata*, Heather, *Eriophorum angustifolium* and *Juncus effusus* vs. CO2 flux, WTDs, pH and soil temperature


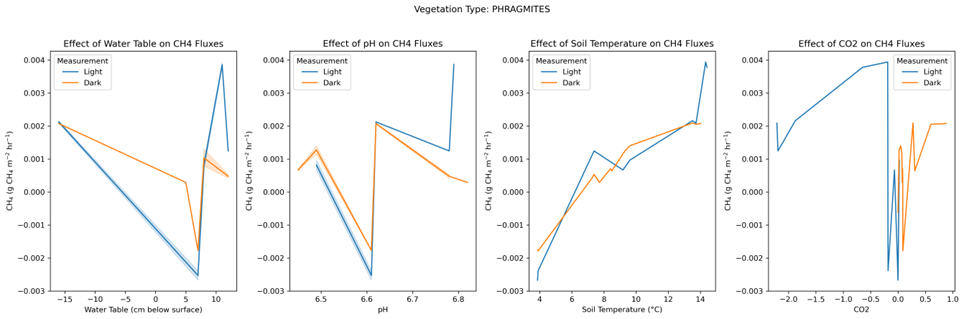

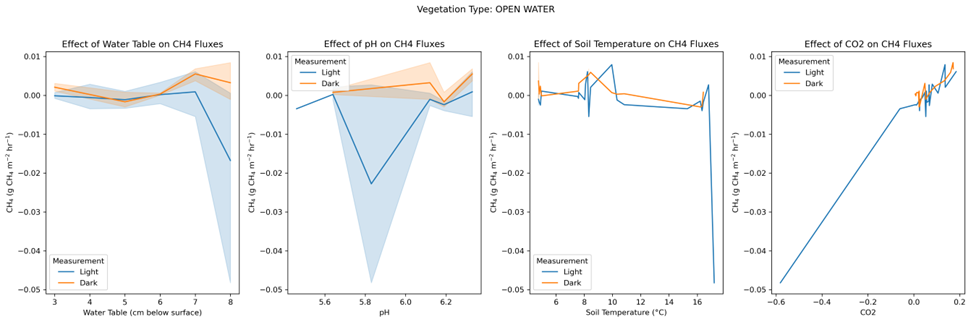


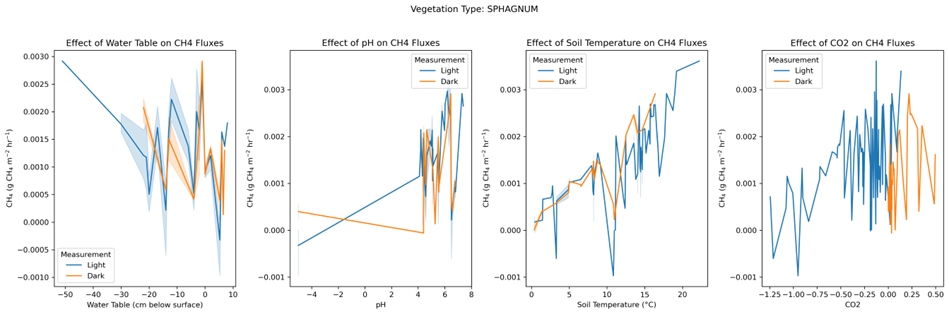


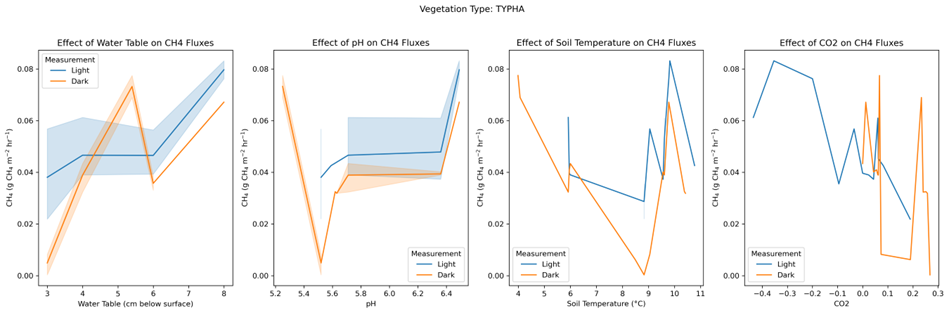


**Figure S12**. Comparing light and dark CH4 fluxes for Open water, *Phragmites australis*, *Sphagnum* communities and *Typha latifolia* vs. CO2 flux, WTDs, pH and soil temperature

**
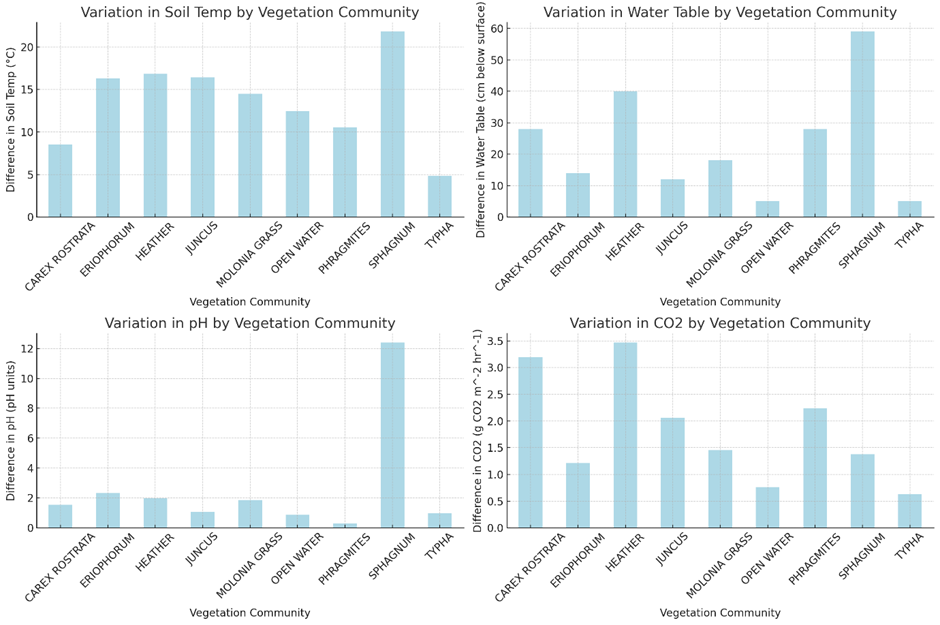
**

**Figure S13**. Measured variation in the environmental parameters for all the vegetation communities
